# Supplementary material for: A dimerization-dependent mechanism regulates enzymatic activation and nuclear entry of PLK1
Source: Springer Nature journal article supplement (doi:10.1038/s41388-021-02094-9), 2021-11-10
Supplement: MOESM2 [file 41388_2021_2094_MOESM2_ESM.pdf]

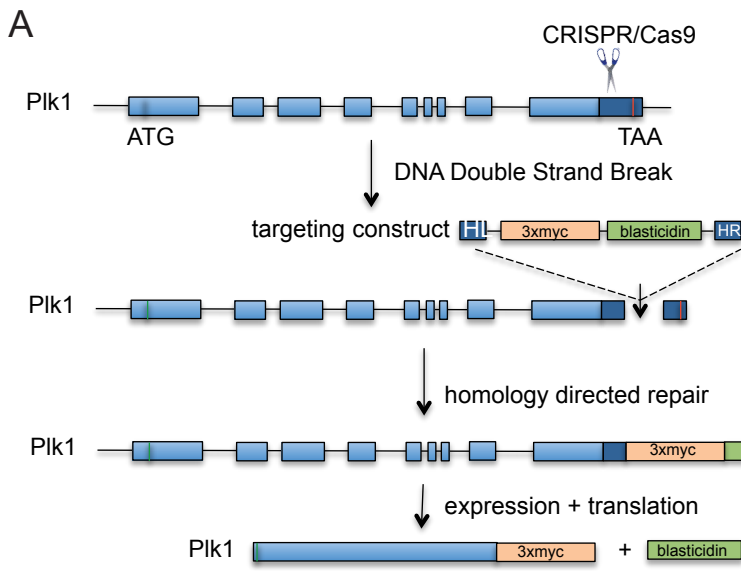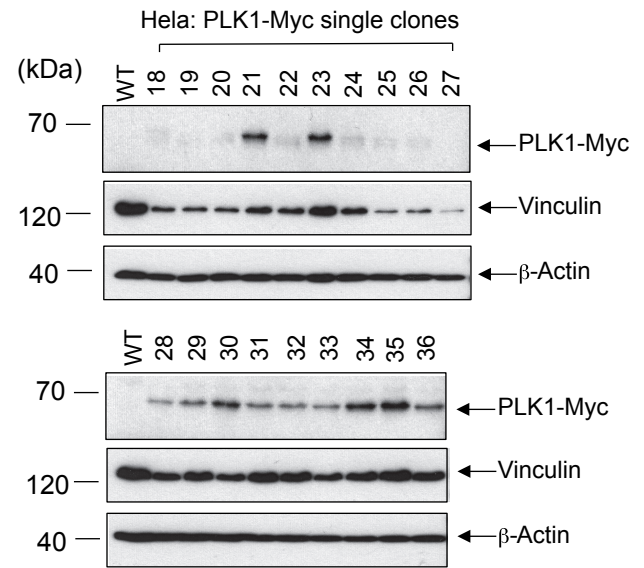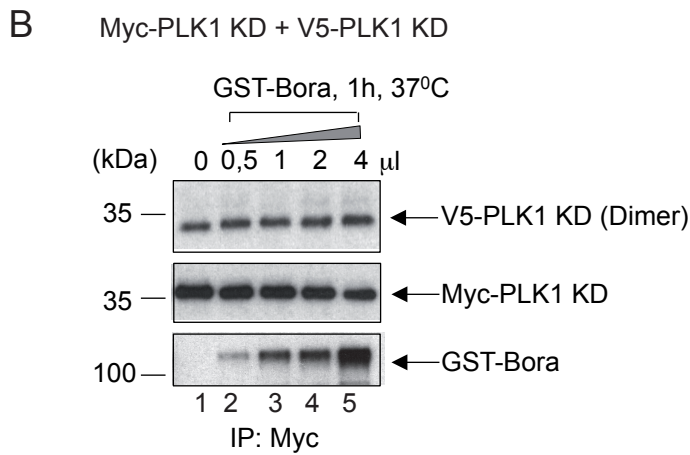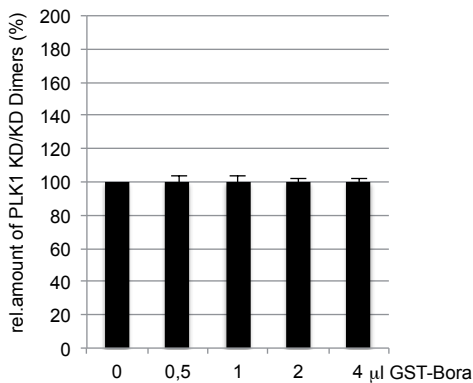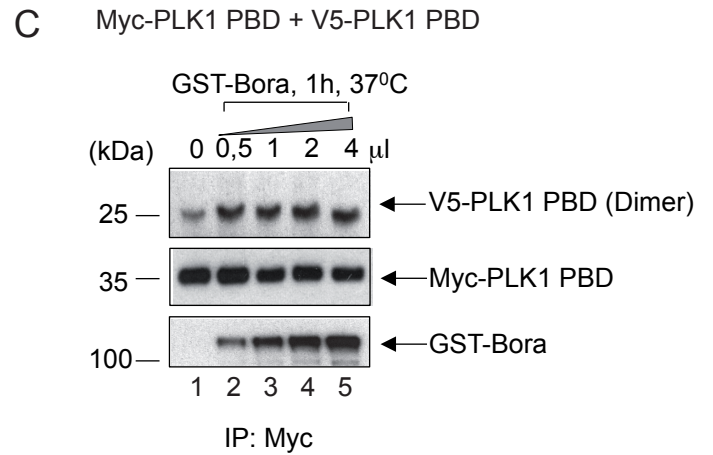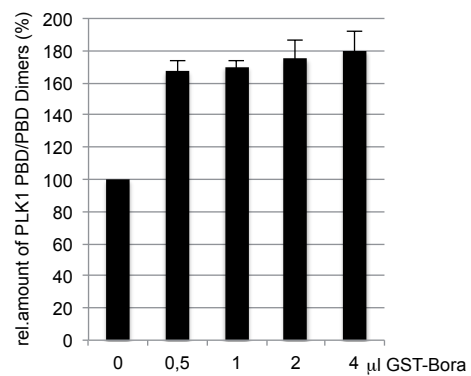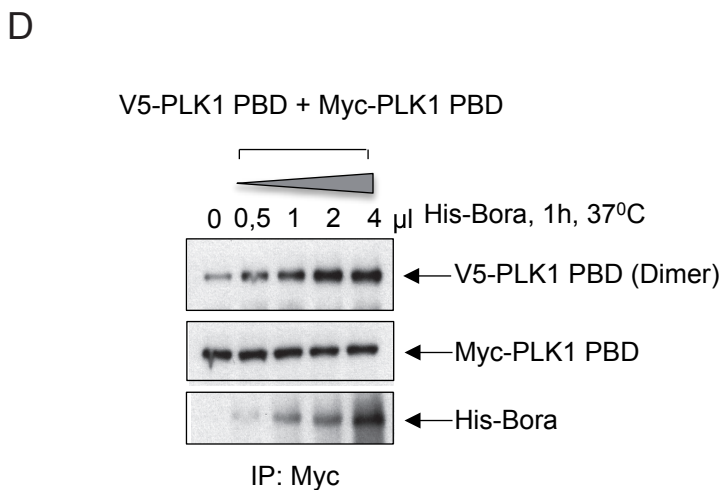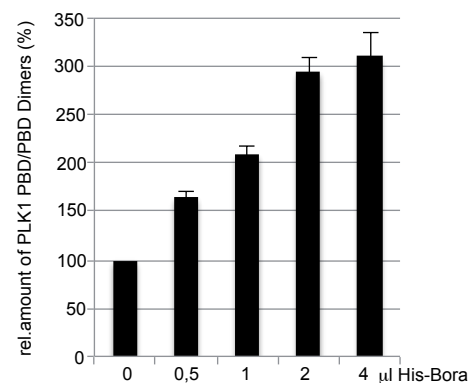

Figure S2.
