# Supplementary material for: A dimerization-dependent mechanism regulates enzymatic activation and nuclear entry of PLK1
Source: Springer Nature journal article supplement (doi:10.1038/s41388-021-02094-9), 2021-11-10
Supplement: MOESM3 [file 41388_2021_2094_MOESM3_ESM.pdf]

E

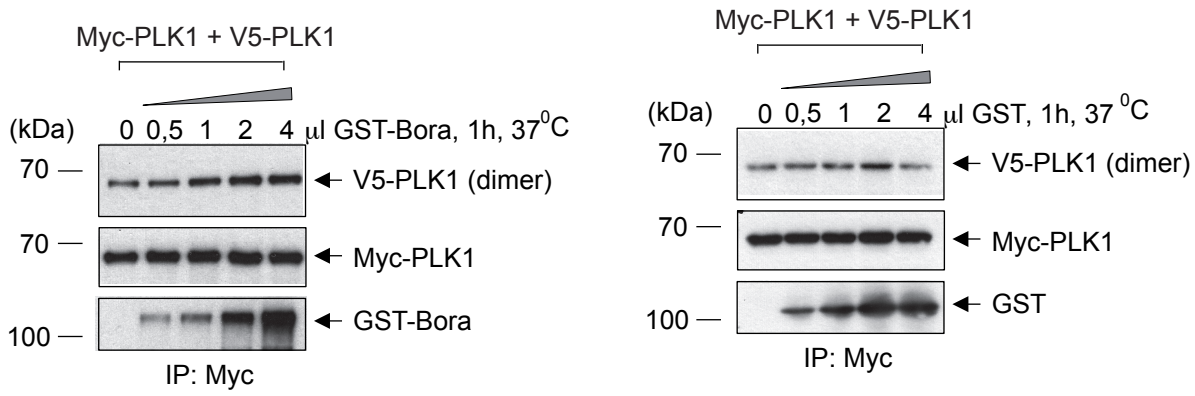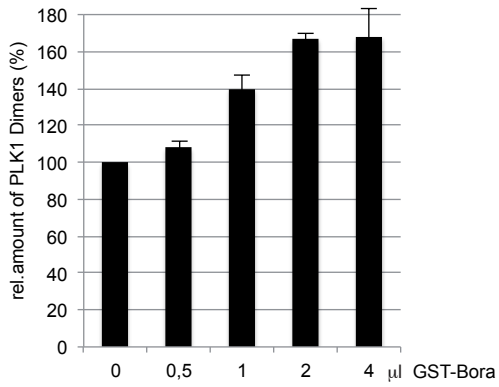

F

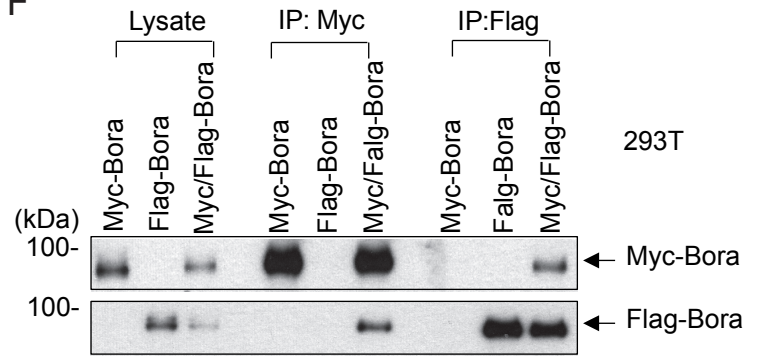

G

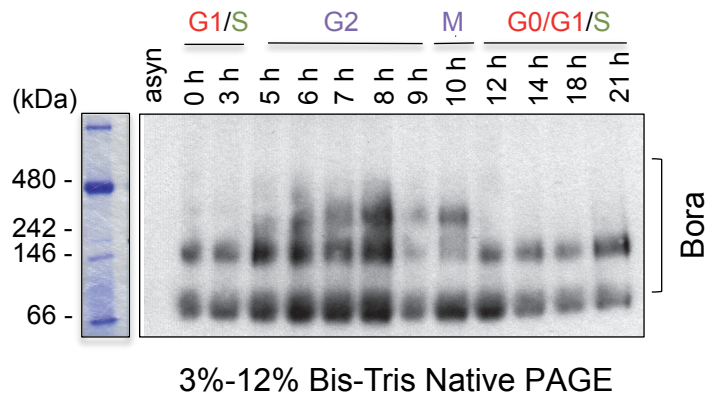

Figure S2.
