# Supplementary material for: A dimerization-dependent mechanism regulates enzymatic activation and nuclear entry of PLK1
Source: Springer Nature journal article supplement (doi:10.1038/s41388-021-02094-9), 2021-11-10
Supplement: MOESM5 [file 41388_2021_2094_MOESM5_ESM.pdf]

A

Hela-PLK1-3xMyc cells

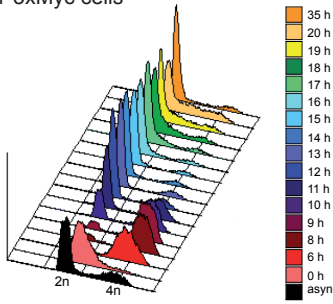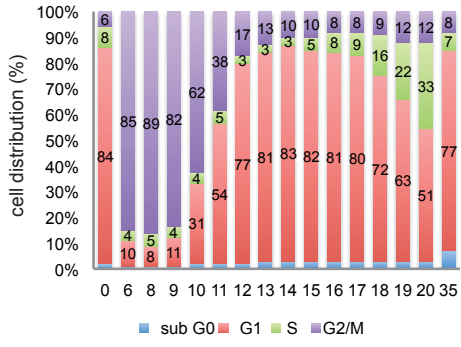

B

Hela WT

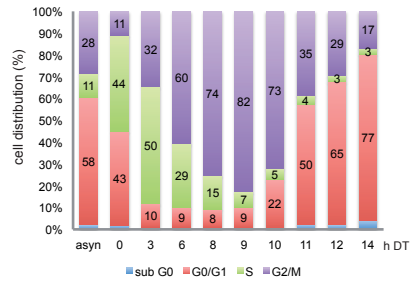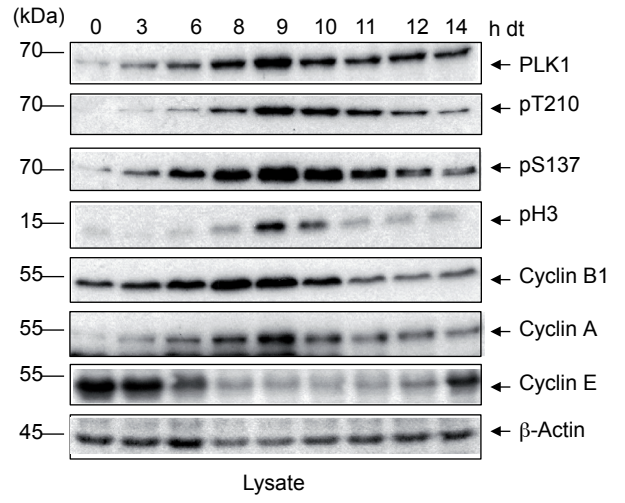

Figure S4.
